# Supplementary material for: Evolution and Expression of the Expansin Genes in Emmer Wheat
Source: MDPI journal article supplement (doi:10.3390/ijms241814120), 2023-09-15
Supplement: s1 [file s1]

**Table S1.** The sequence characterization of Expansin gene family in wild emmer wheat (*Triticum dicoccoides*).

| Gene name | Gene ID      | Protein ID     | Chromosome Location (WEW_v2.1) | Protein length | PI   | MW (Da)  | GRAVY  |
|-----------|--------------|----------------|--------------------------------|----------------|------|----------|--------|
| TdEXP1    | LOC119274440 | XP_037411046.1 | 1A:377360942..377362450(+)     | 282            | 9.44 | 29427.46 | 0.004  |
| TdEXP2    | LOC119292586 | XP_037427296.1 | 1A:382758584..382759811(-)     | 265            | 9.01 | 28503.79 | -0.178 |
| TdEXP3    | LOC119275203 | XP_037411905.1 | 1A:387137179..387142489(-)     | 397            | 6.76 | 42484.7  | -0.353 |
| TdEXP4    | LOC119275230 | XP_037411936.1 | 1A:387558165..387559684(-)     | 265            | 4.98 | 28714.09 | -0.264 |
| TdEXP5    | LOC119275239 | XP_037411942.1 | 1A:387920876..387923024(+)     | 278            | 6.93 | 30691.69 | -0.321 |
| TdEXP6    | LOC119306056 | XP_037438293.1 | 1B:419026522..419027911(-)     | 265            | 9.01 | 28581.86 | -0.186 |
| TdEXP7    | LOC119338963 | XP_037467060.1 | 1B:424876175..424877723(-)     | 270            | 6.50 | 29203.06 | -0.147 |
| TdEXP8    | LOC119338984 | XP_037467079.1 | 1B:425252028..425253707(-)     | 264            | 4.98 | 28627.01 | -0.262 |
| TdEXP9    | LOC119339020 | XP_037467106.1 | 1B:425381975..425384193(+)     | 276            | 6.94 | 30563.54 | -0.324 |
| TdEXP10   | LOC119355777 | XP_037478545.1 | 2A:618451801..618455926(-)     | 281            | 9.09 | 29355.52 | -0.012 |
| TdEXP11   | LOC119351832 | XP_037474522.1 | 2A:673847553..673848964(-)     | 281            | 9.17 | 29498.31 | -0.125 |
| TdEXP12   | LOC119356467 | XP_037479320.1 | 2A:709398854..709399964(+)     | 265            | 8.97 | 28852.14 | -0.175 |
| TdEXP13   | LOC119364918 | XP_037486386.1 | 2B:570094564..570098839(-)     | 281            | 8.89 | 29503.60 | -0.043 |
| TdEXP14   | LOC119368162 | XP_037489385.1 | 2B:634779652..634781078(-)     | 281            | 9.16 | 29494.34 | -0.104 |
| TdEXP15   | LOC119368348 | XP_037489533.1 | 2B:691305474..691307340(+)     | 265            | 9.14 | 28792.13 | -0.174 |
| TdEXP16   | LOC119270920 | XP_037408827.1 | 3A:10197605..10199556(+)       | 274            | 6.85 | 29857.93 | -0.277 |
| TdEXP17   | LOC119270403 | XP_037408303.1 | 3A:713997780..713999196(+)     | 319            | 4.95 | 33600.75 | -0.246 |
| TdEXP18   | LOC119270404 | XP_037408304.1 | 3A:714014191..714015475(+)     | 321            | 5.49 | 33352.39 | -0.247 |
| TdEXP19   | LOC119270415 | XP_037408316.1 | 3A:715476215..715477647(-)     | 321            | 5.50 | 33383.41 | -0.256 |
| TdEXP20   | LOC119273456 | XP_037410502.1 | 3A:719078911..719080405(+)     | 289            | 9.40 | 30150.62 | -0.033 |
| TdEXP21   | LOC119280449 | XP_037417188.1 | 3B:6812473..6814010(+)         | 291            | 6.13 | 31478.82 | -0.268 |
| TdEXP22   | LOC119278538 | XP_037415770.1 | 3B:796958403..796960009(+)     | 311            | 5.27 | 32476.47 | -0.190 |
| TdEXP23   | LOC11928     | XP_037418483.1 | 13B:799433867..7994            | 304            | 5.16 | 31780.55 | -0.280 |

|         |                  |                |                                |     |      |          |        |
|---------|------------------|----------------|--------------------------------|-----|------|----------|--------|
|         | 2323             |                | 35288(-)                       |     |      |          |        |
| TdEXP24 | LOC11928<br>2360 | XP_037418509.1 | 3B:805348619..8053<br>50167(+) | 289 | 9.48 | 30277.98 | 0.023  |
| TdEXP25 | LOC11929<br>1882 | XP_037426595.1 | 4B:629117226..6291<br>19275(+) | 275 | 9.39 | 29527.00 | -0.013 |
| TdEXP26 | LOC11929<br>4080 | XP_037428242.1 | 4B:629404404..6294<br>05664(+) | 271 | 5.75 | 28685.54 | -0.023 |
| TdEXP27 | LOC11929<br>1886 | XP_037426597.1 | 4B:629527603..6295<br>29281(+) | 268 | 8.31 | 28615.61 | -0.045 |
| TdEXP28 | LOC11929<br>4241 | XP_037428365.1 | 4B:662242965..6622<br>44022(+) | 270 | 8.02 | 29067.07 | -0.417 |
| TdEXP29 | LOC11929<br>4247 | XP_037428368.1 | 4B:663120257..6631<br>21346(+) | 270 | 8.02 | 29022.96 | -0.425 |
| TdEXP30 | LOC11929<br>4248 | XP_037428369.1 | 4B:663136523..6631<br>37600(-) | 270 | 8.31 | 29108.07 | -0.441 |
| TdEXP31 | LOC11929<br>2244 | XP_037426975.1 | 4B:671997469..6719<br>99765(-) | 295 | 9.18 | 31855.24 | -0.288 |
| TdEXP32 | LOC11929<br>2247 | XP_037426979.1 | 4B:672288752..6722<br>90860(+) | 343 | 5.80 | 35778.94 | -0.318 |
| TdEXP33 | LOC11929<br>9575 | XP_037432664.1 | 5A:88529123..8853<br>1130(-)   | 342 | 7.01 | 37555.74 | -0.137 |
| TdEXP34 | LOC11930<br>3019 | XP_037435994.1 | 5A:579907297..579<br>910626(-) | 308 | 5.27 | 32320.66 | 0.125  |
| TdEXP35 | LOC11930<br>3996 | XP_037437060.1 | 5A:671107785..671<br>109601(+) | 275 | 9.50 | 29642    | -0.054 |
| TdEXP36 | LOC11929<br>8377 | XP_037431705.1 | 5A:671180708..671<br>181997(+) | 272 | 5.61 | 28785.8  | 0.082  |
| TdEXP37 | LOC11930<br>0405 | XP_037433272.1 | 5A:671265341..671<br>274039(+) | 276 | 6.30 | 29215.21 | -0.008 |
| TdEXP38 | LOC11930<br>3998 | XP_037437061.1 | 5A:671333822..671<br>335466(+) | 273 | 8.78 | 28875.03 | 0.025  |
| TdEXP39 | LOC11929<br>8490 | XP_037431770.1 | 5A:693373758..693<br>374821(+) | 270 | 8.02 | 28996.92 | -0.414 |
| TdEXP40 | LOC11929<br>8496 | XP_037431775.1 | 5A:693930635..693<br>931772(+) | 269 | 8.02 | 28937.89 | -0.404 |
| TdEXP41 | LOC11930<br>4287 | XP_037437363.1 | 5A:698902516..698<br>904395(-) | 341 | 5.91 | 35989.30 | -0.328 |
| TdEXP42 | LOC11930<br>4289 | XP_037437364.1 | 5A:699989006..699<br>991711(+) | 284 | 9.14 | 30771.90 | -0.317 |
| TdEXP43 | LOC11930<br>7652 | XP_037439618.1 | 5B:108110056..1081<br>12086(-) | 341 | 7.50 | 37470.66 | -0.094 |
| TdEXP44 | LOC11931<br>1692 | XP_037443263.1 | 5B:570239552..5702<br>43117(-) | 309 | 5.48 | 32456.80 | 0.090  |
| TdEXP45 | LOC11931<br>8828 | XP_037449303.1 | 6A:16730809..1673<br>2063(-)   | 273 | 9.23 | 29766.71 | -0.247 |
| TdEXP46 | LOC11931<br>8829 | XP_037449304.1 | 6A:16752024..1675<br>3278(-)   | 273 | 9.23 | 29766.71 | -0.247 |
| TdEXP47 | LOC11931<br>9043 | XP_037449457.1 | 6A:16775209..1677<br>6571(-)   | 273 | 8.90 | 29815.70 | -0.270 |
| TdEXP48 | LOC11931<br>8860 | XP_037449328.1 | 6A:16801864..1680<br>3433(+)   | 273 | 9.31 | 29964.04 | -0.254 |

|         |                  |                |                                      |     |      |          |        |
|---------|------------------|----------------|--------------------------------------|-----|------|----------|--------|
| TdEXP49 | LOC11931<br>7359 | XP_037447695.1 | 6A:474351759..474<br>353348(-)       | 287 | 8.74 | 29956.11 | -0.114 |
| TdEXP50 | LOC11931<br>7360 | XP_037447696.1 | 6A:474589513..474<br>591125(+)       | 289 | 9.45 | 30334.83 | -0.118 |
| TdEXP51 | LOC11931<br>9382 | XP_037449766.1 | 6A:474617338..474<br>618907(-)       | 265 | 5.89 | 27780.19 | -0.112 |
| TdEXP52 | LOC11932<br>4841 | XP_037454504.1 | 6B:30135712..30136<br>835(-)         | 273 | 9.28 | 29944.99 | -0.286 |
| TdEXP53 | LOC11932<br>1215 | XP_037450897.1 | 6B:30221094..30222<br>483(-)         | 272 | 9.53 | 29901.11 | -0.216 |
| TdEXP54 | LOC11932<br>4555 | XP_037454236.1 | 6B:30231019..30232<br>258(+)         | 273 | 9.33 | 29978.04 | -0.226 |
| TdEXP55 | LOC11932<br>6789 | XP_037456292.1 | 6B:437190737..4371<br>92134(-)       | 296 | 4.77 | 31467.30 | -0.154 |
| TdEXP56 | LOC11932<br>6665 | XP_037456184.1 | 6B:474729172..4747<br>33304(+)       | 268 | 8.99 | 28449.48 | 0.021  |
| TdEXP57 | LOC11932<br>1419 | XP_037451006.1 | 6B:494803971..4948<br>05683(-)       | 287 | 8.85 | 30016.26 | -0.083 |
| TdEXP58 | LOC11932<br>5403 | XP_037455053.1 | 6B:495119935..4951<br>21548(+)       | 289 | 9.24 | 30294.67 | -0.131 |
| TdEXP59 | LOC11934<br>3097 | XP_037470171.1 | Un(NW_02118025<br>3.1):1027..2330(+) | 249 | 5.78 | 26831.52 | -0.248 |
| TdEXP60 | LOC11934<br>4609 | XP_037470891.1 | Un(NW_02122364<br>8.1):94..1531(-)   | 253 | 8.31 | 26463.01 | -0.020 |
| TdEXP61 | LOC11934<br>5468 | XP_037471429.1 | Un(NW_02124923<br>3.1):4..1307(-)    | 249 | 5.78 | 26831.52 | -0.248 |
| TdEXP62 | LOC11934<br>7256 | XP_037472009.1 | Un(NW_02128664<br>6.1):1412..2882(+) | 274 | 7.17 | 29917.02 | -0.261 |
| TdEXP63 | LOC11934<br>7909 | XP_037472293.1 | Un(NW_02130050<br>9.1):1023..2326(+) | 249 | 5.78 | 26831.52 | -0.248 |

---
