# Supplementary material for: Evolution and Expression of the Expansin Genes in Emmer Wheat
Source: MDPI journal article supplement (doi:10.3390/ijms241814120), 2023-09-15
Supplement: s1 [file s1]

**Table S2.** The sequence characterization of Expansin gene family in durum wheat (*Triticum turgidum*).

| Gene name | Gene ID               | Protein ID | Chromosome Location (Svevo.v1) | Protien length | PI   | MW (Da)  | GRAVY  |
|-----------|-----------------------|------------|--------------------------------|----------------|------|----------|--------|
| TtEXP1    | TRITD_1Av1G<br>134890 | VAH06050.1 | 1A:363489604..<br>363490576(-) | 265            | 9.01 | 28503.79 | -0.178 |
| TtEXP2    | TRITD_1Av1G<br>136420 | VAH06168.1 | 1A:368023374..<br>368028558(-) | 397            | 7.09 | 42581.86 | -0.351 |
| TtEXP3    | TRITD_1Av1G<br>136610 | VAH06173.1 | 1A:368384529..<br>368387394(-) | 350            | 9.25 | 38890.61 | -0.291 |
| TtEXP4    | TRITD_1Av1G<br>136660 | VAH06176.1 | 1A:368490329..<br>368491623(-) | 248            | 4.84 | 26675.75 | -0.240 |
| TtEXP5    | TRITD_1Bv1G<br>127340 | VAH17760.1 | 1B:386796008..<br>386796910(+) | 275            | 9.50 | 28582.46 | -0.020 |
| TtEXP6    | TRITD_1Bv1G<br>128930 | VAH17884.1 | 1B:392974400..<br>392975510(-) | 265            | 9.01 | 28571.82 | -0.183 |
| TtEXP7    | TRITD_1Bv1G<br>130670 | VAH17988.1 | 1B:398680857..<br>398682091(-) | 281            | 8.17 | 30265.84 | -0.096 |
| TtEXP8    | TRITD_1Bv1G<br>130750 | VAH17995.1 | 1B:399057398..<br>399058719(-) | 264            | 4.98 | 28627.01 | -0.262 |
| TtEXP9    | TRITD_2Av1G<br>019110 | VAH25753.1 | 2A:36356017..<br>6359578(-)    | 297            | 8.91 | 31165.37 | -0.049 |
| TtEXP10   | TRITD_2Av1G<br>222160 | VAH34300.1 | 2A:608884437..<br>608888006(-) | 281            | 8.99 | 29427.57 | -0.023 |
| TtEXP11   | TRITD_2Av1G<br>243400 | VAH35437.1 | 2A:665412410..<br>665415862(-) | 312            | 5.38 | 33053.59 | -0.598 |
| TtEXP12   | TRITD_2Av1G<br>243410 | VAH35439.1 | 2A:665419259..<br>665434596(-) | 281            | 9.17 | 29498.31 | -0.125 |
| TtEXP13   | TRITD_2Av1G<br>259030 | VAH36582.1 | 2A:700508959..<br>700509870(+) | 265            | 8.97 | 28852.14 | -0.175 |
| TtEXP14   | TRITD_2Bv1G<br>184290 | VAH49647.1 | 2B:544321683..<br>544325275(-) | 281            | 8.89 | 29513.63 | -0.046 |
| TtEXP15   | TRITD_2Bv1G<br>204120 | VAH50708.1 | 2B:609561374..<br>609614447(-) | 281            | 9.16 | 29494.34 | -0.104 |
| TtEXP16   | TRITD_2Bv1G<br>221670 | VAH51892.1 | 2B:667136912..<br>667138548(+) | 265            | 9.14 | 28792.13 | -0.174 |
| TtEXP17   | TRITD_3Av1G<br>002370 | VAH55612.1 | 3A:3904837..<br>06132(-)       | 291            | 6.70 | 31661.19 | -0.255 |
| TtEXP18   | TRITD_3Av1G<br>002390 | VAH55613.1 | 3A:3947287..<br>48542(-)       | 274            | 6.85 | 29783.79 | -0.278 |
| TtEXP19   | TRITD_3Av1G<br>264150 | VAH68957.1 | 3A:702298729..<br>702316286(+) | 319            | 4.85 | 33648.74 | -0.260 |
| TtEXP20   | TRITD_3Av1G<br>264170 | VAH68961.1 | 3A:702364587..<br>702365639(+) | 321            | 5.49 | 33384.44 | -0.247 |
| TtEXP21   | TRITD_3Av1G<br>264880 | VAH69016.1 | 3A:703737956..<br>703739005(-) | 302            | 5.32 | 31541.27 | -0.263 |
| TtEXP22   | TRITD_3Av1G<br>266830 | VAH69131.1 | 3A:707177302..<br>707178487(+) | 289            | 9.40 | 30150.62 | -0.033 |
| TtEXP23   | TRITD_3Bv1G<br>003000 | VAH70773.1 | 3B:5673418..<br>74650(+)       | 274            | 7.17 | 29828.94 | -0.270 |

|         |                       |            |                                |     |       |          |        |
|---------|-----------------------|------------|--------------------------------|-----|-------|----------|--------|
| TtEXP24 | TRITD_3Bv1G<br>003010 | VAH70775.1 | 3B:5682013..56<br>83358(+)     | 291 | 6.44  | 31774.17 | -0.318 |
| TtEXP25 | TRITD_3Bv1G<br>258860 | VAH85002.1 | 3B:778479457..<br>778480486(-) | 311 | 5.27  | 32476.47 | -0.190 |
| TtEXP26 | TRITD_3Bv1G<br>261060 | VAH85168.1 | 3B:785071863..<br>785073054(+) | 289 | 9.44  | 30230.76 | -0.017 |
| TtEXP27 | TRITD_4Bv1G<br>185720 | VAI10271.1 | 4B:621399958..<br>621401392(+) | 275 | 9.39  | 29527    | -0.013 |
| TtEXP28 | TRITD_4Bv1G<br>185860 | VAI10278.1 | 4B:621696982..<br>621861807(+) | 271 | 8.28  | 28897.93 | -0.055 |
| TtEXP29 | TRITD_4Bv1G<br>199480 | VAI11125.1 | 4B:656286007..<br>656286819(+) | 270 | 8.02  | 29022.96 | -0.425 |
| TtEXP30 | TRITD_4Bv1G<br>202590 | VAI11391.1 | 4B:662952440..<br>662954224(+) | 292 | 9.18  | 31684.08 | -0.287 |
| TtEXP31 | TRITD_4Bv1G<br>203220 | VAI11452.1 | 4B:664300001..<br>664301720(-) | 341 | 5.80  | 35604.78 | -0.315 |
| TtEXP32 | TRITD_5Av1G<br>037950 | VAI13686.1 | 5A:87266261..8<br>7267784(-)   | 342 | 7.01  | 37555.74 | -0.137 |
| TtEXP33 | TRITD_5Av1G<br>240040 | VAI24733.1 | 5A:624380019..<br>624381563(+) | 294 | 10.69 | 31526.27 | -0.217 |
| TtEXP34 | TRITD_5Av1G<br>252100 | VAI25642.1 | 5A:653104455..<br>653105678(-) | 161 | 4.80  | 17762.89 | -0.266 |
| TtEXP35 | TRITD_5Av1G<br>252510 | VAI25650.1 | 5A:654181679..<br>654183784(+) | 284 | 9.04  | 30772.89 | -0.317 |
| TtEXP36 | TRITD_5Bv1G<br>034910 | VAI28019.1 | 5B:97070838..9<br>7072445(-)   | 341 | 7.50  | 37470.66 | -0.094 |
| TtEXP37 | TRITD_6Av1G<br>006210 | VAI41821.1 | 6A:14053180..1<br>4054678(-)   | 301 | -     | -        | -0.341 |
| TtEXP38 | TRITD_6Av1G<br>006600 | VAI41862.1 | 6A:14873134..1<br>4874437(-)   | 273 | 9.23  | 29921.91 | -0.262 |
| TtEXP39 | TRITD_6Av1G<br>006660 | VAI41864.1 | 6A:14993380..1<br>4994413(+)   | 273 | 9.46  | 29837.82 | -0.263 |
| TtEXP40 | TRITD_6Av1G<br>136030 | VAI46788.1 | 6A:396990415..<br>396991422(+) | 297 | 4.71  | 31640.45 | -0.157 |
| TtEXP41 | TRITD_6Av1G<br>158520 | VAI47825.1 | 6A:458944951..<br>458946119(-) | 287 | 8.74  | 29956.11 | -0.114 |
| TtEXP42 | TRITD_6Av1G<br>158640 | VAI47826.1 | 6A:459184425..<br>459185602(+) | 289 | 9.45  | 30322.78 | -0.136 |
| TtEXP43 | TRITD_6Bv1G<br>009330 | VAI53174.1 | 6B:24902745..2<br>4903925(-)   | 273 | 9.65  | 30047.12 | -0.281 |
| TtEXP44 | TRITD_6Bv1G<br>009410 | VAI53177.1 | 6B:25037718..2<br>5038790(+)   | 273 | 9.38  | 29944.05 | -0.214 |
| TtEXP45 | TRITD_6Bv1G<br>009420 | VAI53180.1 | 6B:25107433..2<br>5158362(+)   | 273 | 9.28  | 29913.92 | -0.267 |
| TtEXP46 | TRITD_6Bv1G<br>128400 | VAI58270.1 | 6B:415352125..<br>415353129(-) | 296 | 4.77  | 31467.30 | -0.154 |
| TtEXP47 | TRITD_6Bv1G<br>138270 | VAI58919.1 | 6B:453206534..<br>453210161(+) | 220 | 8.58  | 22945.21 | 0.165  |
| TtEXP48 | TRITD_6Bv1G<br>144950 | VAI59266.1 | 6B:473053959..<br>473055168(-) | 287 | 8.85  | 30016.26 | -0.083 |
| TtEXP49 | TRITD_6Bv1G           | VAI59267.1 | 6B:473361174..                 | 289 | 9.24  | 30294.67 | -0.131 |

145040

473362352(+)

---

"-" showed no results.
